# Supplementary material for: Ciprofloxacin-Loaded Titanium Nanotubes Coated with Chitosan: A Promising Formulation with Sustained Release and Enhanced Antibacterial Properties
Source: MDPI journal article supplement (doi:10.3390/pharmaceutics14071359), 2022-06-27
Supplement: s1 [file s1]

Supporting information

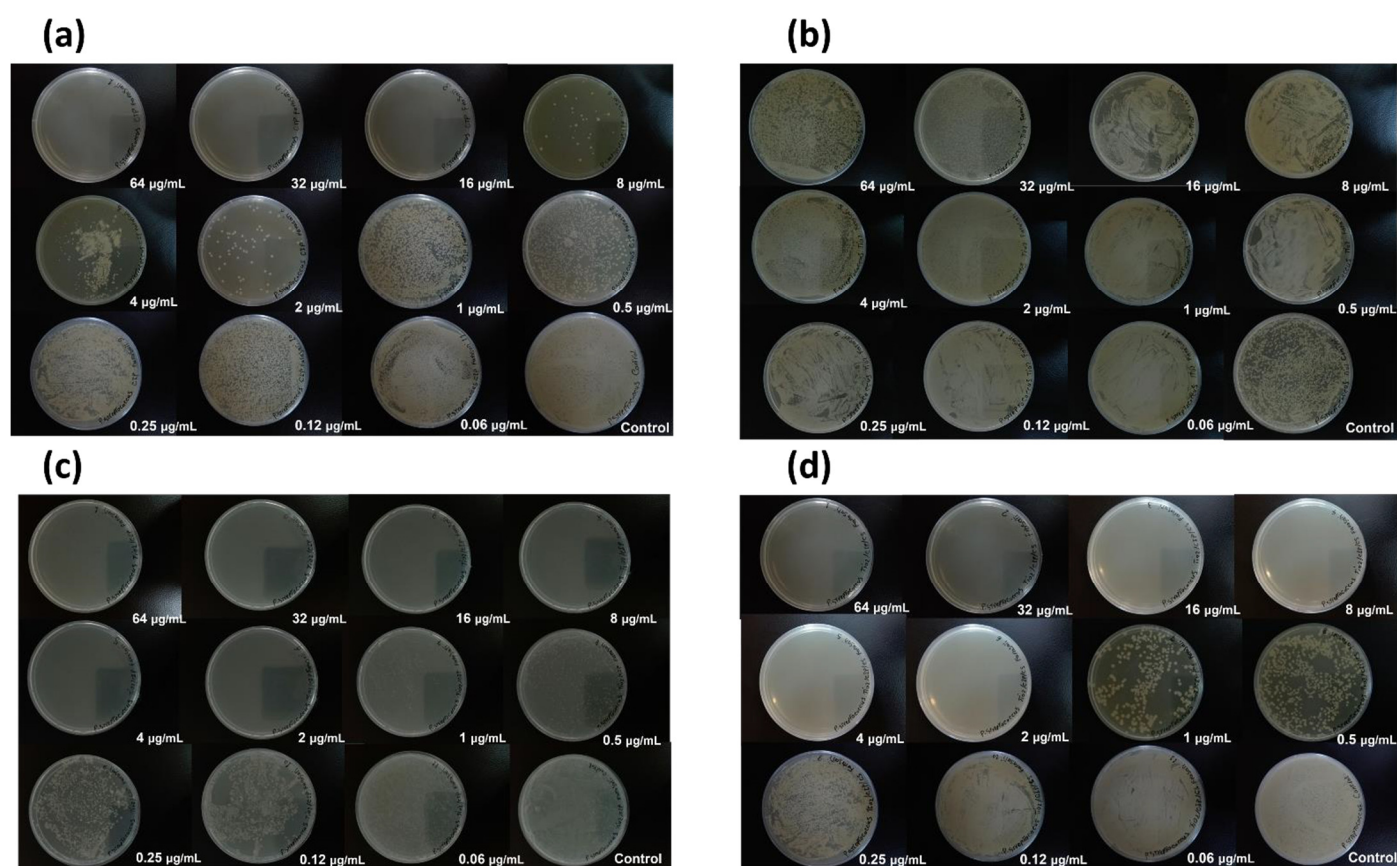

**Figure S1.** Evaluation of MBC values of tested a) CIP, b) TiO<sub>2</sub> NTs, c) TiO<sub>2</sub>/CIP, and d) TiO<sub>2</sub> NTs/CIP/Cs in different concentrations against *Peptostreptococcus*

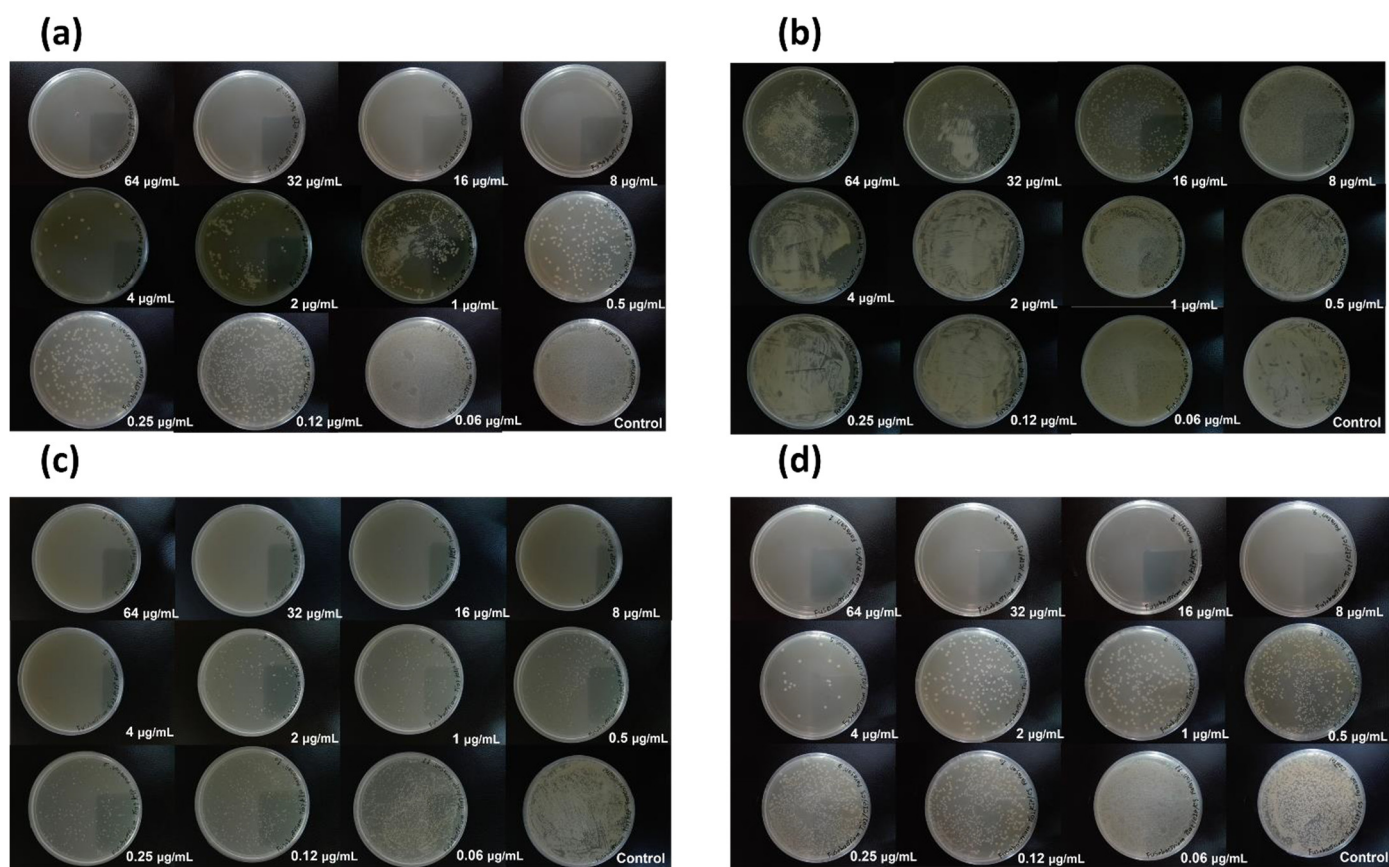

**Figure S2.** Evaluation of MBC values of tested a) CIP, b) TiO<sub>2</sub> NTs, c) TiO<sub>2</sub>/CIP, and d) TiO<sub>2</sub> NTs/CIP/Cs in different concentrations against *Fusobacterium*.
